# 1 Ephemeral Resource Availability Makes Wild Guppies More 2 Social

3 Authors: Lysanne Snijders<sup>1,2</sup>, Stefan Krause<sup>3</sup>, Alan Novaes Tump<sup>4</sup>, Michael Breuker<sup>3</sup>,  
4 Indar W. Ramnarine<sup>5</sup>, Ralf Kurvers<sup>2,4</sup>, Jens Krause<sup>2,6</sup>

5 1 Behavioural Ecology Group, Wageningen University, 6708 PB Wageningen, The Netherlands.

6 2 Department of Biology and Ecology of Fishes, Leibniz-Institute of Freshwater Ecology and Inland Fisheries,  
7 12587 Berlin, Germany.

8 3 Department of Electrical Engineering and Computer Science, Lübeck University of Applied Sciences, 23562  
9 Lübeck, Germany.

10 4 Center for Adaptive Rationality, Max Planck Institute for Human Development, 14195 Berlin, Germany.

11 5 Department of Life Sciences, University of the West Indies, St Augustine, Trinidad and Tobago.

12 6 Faculty of Life Sciences, Humboldt-Universität zu Berlin, 10115 Berlin, Germany.

13 \*Corresponding author: [lysanne.snijders@wur.nl](mailto:lysanne.snijders@wur.nl)

14

## 15 Abstract:

16 Resource availability and sociality are tightly coupled. Sociality facilitates resource access in a wide range  
17 of animal species. Simultaneously, resource availability may change sociality. However, experimental  
18 evidence for resource-driven social changes in the wild, beyond local aggregations at the resource,  
19 remains scarce. Moreover, it is largely unclear how potential changes in sociality relate to the social  
20 foraging benefits obtained by individual group members. Here, we recorded immediate and prolonged  
21 changes in social dynamics following ephemeral food availability in 18 mixed-sex Trinidadian guppies  
22 (*Poecilia reticulata*) groups in natural rainforest pools. Using a counter-balanced within-group design, the  
23 social associations within each group was observed before, between and after ephemeral patch  
24 availability for two consecutive days. We show that groups increased their time spent socially two-fold  
25 following ephemeral food patch, but not control (empty) patch, availability. Groups with stronger  
26 foraging motivation, measured as the average proportion of fish feeding, showed a stronger increase in  
27 sociality. This resource-induced increase in sociality was still detectable the next day. Increase in the  
28 time spent socially by a group also positively correlated with the more frequent arrival at detected food  
29 patches for individual members of motivated groups, which, in turn, correlated strongly with individual  
30 food consumption. Our study causally demonstrates that changes in ephemeral resource availability can  
31 induce rapid, substantial, and prolonged changes in the social dynamics of wild fish and that this change  
32 positively correlated with individual foraging success. Further research is needed to investigate whether  
33 this social change is a cause or consequence of individual foraging success and why some groups  
34 respond more strongly than others.

35 **Keywords:** dynamic social networks, foraging ecology, group personality, social facilitation, social  
36 foraging, social plasticity

## 37 Introduction

38 The selective advantage of living in groups has shaped the evolution of sociality across taxa (Garcia & De  
39 Monte, 2013; Rubenstein & Abbot, 2017). Indeed, social attributes positively predict fitness measures in  
40 a variety of species, ranging from female savannah baboons (*Papio cynocephalus*) (Silk et al., 2003) and  
41 male wire-tailed manakin (*Pipra filicauda*) (Ryder et al., 2009) to male forked fungus beetles  
42 (*Bolitotherus cornutus*) (Formica et al., 2012). Fitness advantages of sociality can emerge via a variety of  
43 pathways (Krause & Ruxton, 2002), for example by facilitating predation avoidance (Karplus et al., 2006;  
44 Landeau & Terborgh, 1986; Shier & Owings, 2007), mating opportunities (Kaiser et al., 2018; Oh &  
45 Badyaev, 2010) or foraging success (Brown, 1988; Ellis et al., 2017; Herringe et al., 2022). An increase  
46 in foraging success can be especially impactful because it has the potential to positively affect both  
47 fitness components: survival, and reproduction (Abrahams, 1993; Blanckenhorn, 1991; Bradbury &  
48 Vehrencamp, 1977; Clark & Mangel, 1986; Clay et al., 2018; Ellis et al., 2017; Morse & Stephens, 1996).

49 Sociality facilitates foraging success in a wide range of animals, both in captivity (Grand & Dill, 1999;  
50 Harpaz & Schneidman, 2020; Krebs et al., 1972; Pitcher et al., 1982), and in the wild (Morand-Ferron &  
51 Quinn, 2011; Snijders et al., 2021). On an individual level, more social guppies (*Poecilia reticulata*) and  
52 great tits (*Parus major*) with more central network positions visited more novel food patches (Aplin et  
53 al., 2012; Snijders et al., 2018, 2019), while more social three-spined sticklebacks (*Gasterosteus*  
54 *aculeatus*) experienced less food intake variance (Jolles et al., 2017). Such individual variation in social  
55 tendency or position can be relatively consistent (Aplin et al., 2015; Bierbach et al., 2018; Harel et al.,  
56 2017; Jolles et al., 2017; Krause et al., 2017), indicating a target for natural selection to act on  
57 (Greenwood et al., 2013; Wright et al., 2006), e.g., through social foraging benefits.

58 Individuals that consistently differ in their social tendencies, may still adjust their social behaviour in  
59 response to a change in environmental context (Heathcote et al., 2017; Hoare et al., 2004; Ling et al.,  
60 2019; Rodriguez-Pinto et al., 2020; Schaerf et al., 2017; Snijders et al., 2017; Wolf et al., 2018). For  
61 example, social behaviour regularly changes with resource availability (Brown, 1988; Chapman et al.,  
62 1995; Dorning & Harris, 2019; Foster et al., 2012). Such social changes could be a consequence of  
63 independent aggregation near a resource but could also reflect a strategy to flexibly capitalise on social  
64 foraging benefits. These potential mechanisms are challenging to disentangle without experimental  
65 manipulation and resource-independent sociality measurements, yet these are key for better  
66 understanding of the mechanisms and functions of social systems. An experimental study in semi-captive  
67 ring-tailed lemurs (*Lemur catta*) showed that lemurs increased their social connections to individuals  
68 they had observed solving a newly introduced foraging task, and that this adjustment persisted even  
69 after the task was removed (Kulahci et al., 2018). Another experimental field study showed that without  
70 easy access to supplemental food, wild blue tits (*Cyanistes caeruleus*) and great tits increasingly foraged  
71 in multispecies flocks (Grubb, 1987). These few experimental studies in the (semi) wild suggest the  
72 instrumental use of sociality by animals to gain foraging benefits.

73 Here, we investigated whether changes in resource availability induce adjustments in sociality and  
74 whether individuals in groups that show stronger social adjustment accrue larger foraging benefits. We  
75 experimentally studied the immediate and longer-term effects of ephemeral resource availability on the  
76 social dynamics of 18 mixed-sex sets of wild Trinidadian guppies, in natural pools in the rainforest. Sets  
77 consisted of seven to eight fish caught from the same location. For readability purpose, we refer to these  
78 sets as 'groups'. Using a counter-balanced within-group design, we tested each group for two  
79 consecutive days using three social observation sessions per day. These observation sessions were

80 alternated with two series of food (or control) presentations on the first day and vice versa on the second  
81 day. First, we tested if groups consistently differed in the overall time their members spent socially.  
82 Second, we tested if this time spent socially changed in response to ephemeral resource availability,  
83 predicting that groups would become more social to locate more of the spatially unpredictable ephemeral  
84 food resources. Third, we tested if these changes in the overall time groups spent socially translated into  
85 a higher foraging success for individuals in such groups.

## 86 Methods

### 87 Study area and subjects

88 The study took place in 2019 between March 6<sup>th</sup> and March 24<sup>th</sup> in the upper rainforest region of the  
89 Turure River (10°41'8"N, 61°10'22"W) of Trinidad's Northern Range. This region is considered a low  
90 predation site (Barbosa et al., 2018; Deacon et al., 2018) and is relatively resource-poor (Grether et al.,  
91 2001). We used four natural pools (approximate surface area range of the pools: 2.5–5 m<sup>2</sup>; depth range:  
92 10–30 cm), which were modified around the edges to allow a constant in- and outflow of water while  
93 minimizing opportunities for fish migration. Guppies originally occurring in our experimental pools were  
94 removed. We collected study subjects from a nearby stretch of the river. Upon capture, adult fish (N =  
95 144, 50/50 sex-ratio) were measured (females: Mean ± SD = 24.3 ± 2.4 mm, males: Mean ± SD = 22.1  
96 ± 1.6 mm) and given an individually unique colour mark using Visible Implant Elastomer (VIE) tags  
97 (©Northwest Marine Technology Inc.) (Croft et al., 2003; Snijders et al., 2019). We took care to  
98 compose the experimental groups (N = 18) with fish caught from the same pool to retain familiarity  
99 within groups. The subject groups were released in their respective experimental pools and left to settle  
100 overnight with experimental trials starting the next morning. Four fish left the experimental pool (one  
101 male, three females), resulting in a total of 14 groups of eight fish and four groups of seven fish. Our  
102 research complied with the law and relevant ethical regulations at the time of and in the country of study  
103 (Trinidad and Tobago). Specifically, the study was performed in accordance with the 'Basic Principles  
104 Governing the Use of Live Animals and Endangered Species in Research' at the University of the West  
105 Indies as part of the 'Policy and Procedures on Research Ethics' of the University of the West Indies  
106 Committee on Research Ethics. All subjects were released on the same day as their final trials.

### 107 Experimental design

108 We used a counter-balanced within-group design, meaning that all groups received both the food and  
109 control treatments, with half of the groups receiving the control treatments first and the other half the  
110 food treatments first. Each group was tested for two consecutive days, comprising one food treatment  
111 and one control day. Each day consisted of three social observation sessions alternated with two series of  
112 60 food or control presentations following a 2 min break. Each day would thus start and end with a social  
113 observation session (Table 1).

114

115 **Table 1.** Schematic overview of the experimental design. Groups of seven or eight individuals, distributed over  
 116 four pools, received food on either day 1 and control on day 2 or vice versa. Within each day social behaviour  
 117 was observed before (S0), in between (S1), and after (S2) food (F1 & F2) or control (C1 & C2) presentations.

| Day 1   |    |    |    |    | Day 2   |    |    |    |    | Groups | Individuals |
|---------|----|----|----|----|---------|----|----|----|----|--------|-------------|
| Food    |    |    |    |    | Control |    |    |    |    | N = 9  | N = 71      |
| S0      | F1 | S1 | F2 | S2 | S0      | C1 | S1 | C2 | S2 |        |             |
| Control |    |    |    |    | Food    |    |    |    |    | N = 9  | N = 69      |
| S0      | C1 | S1 | C2 | S2 | S0      | F1 | S1 | F2 | S2 |        |             |

118

### 119 **Social observations**

120 To quantify potential changes in social dynamics following ephemeral resource availability, we performed  
 121 focal follow observations of each group member before (S0), in between (S1), and after (S2) the food or  
 122 control presentations. Each individual was followed for three minutes while we noted the identity of its  
 123 nearest neighbour and its location in the pool every 10 s. We considered a guppy a neighbour when it  
 124 was within four body lengths of the focal subject (Krause et al., 2017; Snijders et al., 2019; Wilson et  
 125 al., 2014). To determine the location of the focal subject, we divided each pool in five zones covering the  
 126 whole pool, corresponding to the nearest of the five a-priori assigned resource presentation locations  
 127 (see below). In addition, we scored aggression, display, and harassment events performed or received  
 128 by the focal subject continuously during the three minute period.

### 129 **Resource presentations**

130 Following the first social observation session, we conducted the first series of food or control  
 131 presentations. One series consisted of 60 presentations, simulating an influx of temporarily available  
 132 resources, e.g., fallen fruits or insects. Each presentation and each break between two presentations  
 133 lasted 15 seconds. Food or control patches were presented at five a-priori assigned locations spread out  
 134 through the entire pool and these locations were alternated randomly with the restriction that every five  
 135 trials each location received a presentation. As food resources, we used small lead balls (8 mm diameter)  
 136 which were covered with a mix of gelatine and crushed fish food flakes including carotenoids (TetraPro©;  
 137 Spectrum Brands Inc). Multiple individuals could feed from this resource simultaneously. As a control, we  
 138 used the same balls but without food cover. During a presentation, we lowered the ball into the water  
 139 until approximately two cm above the bottom at the randomly assigned location. We scored the identity  
 140 and the order of the individuals that arrived and whether they took at least one bite from the food. After  
 141 the 60 presentations followed a two-minute break and we continued with the next social observation  
 142 session. We thus conducted two series (F1 & F2 or C1 & C2, Table 1) of 60 presentations a day.

143 During one series the food resource was completely depleted before the final presentation and therefore  
 144 ended 17 presentations early, leading to a total of 4,303 analysed presentations containing 33,481  
 145 individual presence/absence data points. Because biting behaviour could not be reliably determined  
 146 during six of the presentations, we excluded these from the analysis of feeding events but retained them  
 147 in the other analyses.

### 148 **Statistical analyses**

149 *Social dynamics*

150 To quantify the social dynamics during the social observations, we used a Markov chain analysis to  
151 calculate the proportion of time an individual spends near other individuals, a measure we refer to as  
152 'social time' (Snijders et al., 2018, 2019; Wilson et al., 2014). In the Markov chain analysis, we  
153 translated our focal observations to a sequence of behavioural social states for each individual, being  
154 either in the proximity of another individual (i.e., within four body lengths) or alone. When in a social  
155 state, the focal individual can stay social or transition to being alone. The social time of each fish was  
156 quantified using the transition probabilities  $P_{a \rightarrow s}$ , which is the probability of ending being alone, and  
157  $P_{s \rightarrow a}$ , which is the probability of ending being social, using the formula:  $P_{a \rightarrow s} / (P_{s \rightarrow a} + P_{a \rightarrow s})$ . We  
158 estimated these probabilities based on the observed frequencies of state changes. If one of the state  
159 changes was not observed, we increased the frequencies of all state changes by 1 to avoid the unrealistic  
160 probability of 0. In earlier studies with Trinidadian guppies, social time and the transition probabilities  
161 underlying social time were shown to be consistent throughout water surface area manipulations and  
162 translocations (Krause et al., 2017; Wilson et al., 2015). Our design allowed us to gather social data  
163 before, during, and after ephemeral resource availability, on the same day. However, this came at the  
164 cost of resolution at the individual level as we could only collect three minutes of data per individual per  
165 session. We, therefore, focussed our social analyses on the group and sex-level. To do this, we  
166 determined the overall transition probabilities (i.e.,  $P_{s \rightarrow a}$  and  $P_{a \rightarrow s}$ ) and social time per group (or per  
167 sex within each group) and social observation session. We estimated each overall transition probability  
168 based on the sum of the numbers of state changes across all focal individuals in a group (or per sex of  
169 the focal individuals within a group). Because group-level social times are independent of each other, we  
170 did not apply a randomisation procedure for these data.

171 We evaluated potential carry-over effects of local aggregation from the food presentations by testing for  
172 effects of the location of the last food presentation and observation order. To test whether a higher social  
173 time is linked to the location of the last food presentation, we determined for each group the distribution  
174 of social contacts among the five spatial zones for each of the three social sessions on the food treatment  
175 day. We then compared the fractions of social contacts in the spatial zone of the last food presentation  
176 before ( $S_0$ ) and after food presentations ( $S_1$  or  $S_2$ ) using Matched-pairs Wilcoxon tests. To test for an  
177 effect of observation order, we performed within-group randomisation of the social times, to account for  
178 the dependency of within-group social data (10,000 randomisation steps), and measured the rank  
179 correlation (Kendall's coefficient) with the observation order.

180 *General modelling approach*

181 To analyse i) group-level consistency in social time, ii) the effects of ephemeral resource availability on  
182 group-level social time, and iii) the relation between group-level social change and individual foraging  
183 success, we ran (generalized) linear mixed models (optimizer = bobyqa) from the *lme4* package (Bates  
184 et al., 2015) in R (R Core Team, 2021) version 4.1.2 in R Studio version 1.4.1717 (© 2009–2021  
185 RStudio, Inc.). Model assumptions were confirmed by checking normality, overdispersion, outliers, and  
186 quantile deviations using the 'simulateResiduals()' function of the *DHARMA* package (Hartig, 2021).  
187 Based on these model diagnostics, certain fixed or random effects (but only those serving as control  
188 variables) were included or excluded. These changes did not qualitatively change our conclusions and are  
189 reported in the supplementary table captions. We evaluated the significance for variables by comparing  
190 the model with and without the fixed effect or interaction of interest, using analysis of deviance (Type III  
191 Wald Chi-square tests). REML was set to false for the evaluation of fixed effects. Non-significant

192 interactions were removed ( $P > 0.05$ ), while all main effects were kept irrespective of significance. All  
193 continuous variables were centred and scaled by subtracting the mean and dividing by the standard  
194 deviation, respectively. We created the figures with the *ggplot2* package (Wickham, 2016). The data and  
195 R-script are available on the Open Science Framework: [osf.io/75vtn](https://osf.io/75vtn) (Snijders et al., 2022).

#### 196 *Consistency of sociality*

197 We tested the consistency of group-level social time by constructing mixed models with group identity as  
198 a random factor, using the `rpt()` function (1000 bootstraps) of the *rptR* package (Stoffel et al., 2017).  
199 We calculated the adjusted repeatability of group-level social time for the control and food treatment  
200 separately. These models included social session (three levels: S0, S1, S2, Table 1), day (two levels: day  
201 1, day 2, Table 1), and pool identity (four levels: Pool 1, 2, 3, and 4). In addition, we added the group-  
202 level variables group size (seven or eight fish) and group-level foraging motivation (overall proportion of  
203 present individuals feeding). A low group-level foraging motivation may be reflective of a more fearful  
204 state, leading guppies to be more social. Excluding these group-level variables did not qualitatively  
205 change our conclusions. Differences in variance between the social sessions within control and food  
206 treatment were tested using Levene's test for equal variances.

#### 207 *Ephemeral resource effects on sociality*

208 To test if the time spent socially by groups increased following ephemeral resource availability, we  
209 analysed the effect of the interaction between treatment (two levels: food and control) and social session  
210 on group-level social time, using a linear mixed model ( $N = 108$  sessions). In the case of a significant  
211 interaction, we performed post-hoc contrasts using the *emmeans* package (method = sequential, simple  
212 = each, adjust = mvt) (Lenth, 2021). As control variables, we added the main effects of day, group size,  
213 and pool identity and the interaction between treatment and foraging motivation. Group identity was  
214 included as random effect. Subsequently, we examined the effect of ephemeral resource availability on  
215 the group-level transition probabilities underlying social time (i.e.,  $P_{s \rightarrow a}$  and  $P_{a \rightarrow s}$ ). Similarly, we  
216 examined the effects of ephemeral resource availability on group-level social time for the sexes  
217 separately, using the final model for group-level social time as starting model. To test if ephemeral  
218 resource availability had a prolonged effect on group-level social time, we tested whether treatment had  
219 a significant effect on the first social session of the next morning. Due to the limited sample size for this  
220 final analysis ( $N = 18$  groups/sessions), we used a simple linear model only including treatment. To test  
221 if ephemeral resource availability also affected the frequency of sexual behaviours, we calculated the  
222 sum of display and sexual harassment behaviours for each group per social session, distinguishing  
223 between behaviours performed by males and behaviours received by females. We applied generalized  
224 linear mixed models (family = Poisson) and used the model construction of the final model for sex-  
225 specific social time as the starting model. The frequency of aggression was low (5% of all social  
226 observations) and therefore not further explored.

#### 227 *Change in sociality and individual foraging success*

228 To test if a change in the time a group spends social in response to ephemeral resource availability  
229 correlated with individual foraging success, we ran a generalized linear mixed model (family = binomial)  
230 with individual arrival at a detected food patch (two levels: yes, no) as dependent variable ( $N = 9,663$ ).  
231 Social change was calculated as the difference between group-level social time after the first food session  
232 (S1) and before (S0). The model included the interactions between social change and group-level  
233 foraging motivation, sex (two levels: male and female), and food presentation series (two levels: F1 and

234 F2, Table 1). In addition, the model included day, size (length in mm, centred on sex, continuous), group  
235 size, and pool identity as the main effects. Group identity nested in pool identity (18 levels), individual  
236 identity nested in-group identity (140 levels), presentation location nested in pool identity (20 levels),  
237 and presentation identity (1,237 levels) were included as random effects. Note that pool was not  
238 included as a random effect but as a fixed effect. We furthermore evaluated if a correlation between  
239 social change and foraging success (see Results) could be explained by a change in sexual behaviour  
240 frequency, i.e., if an increase in social time merely represents an increase in sexual behaviour following  
241 food intake. For this, first, the effect of sex-specific social change on food patch arrival was tested using  
242 the final model for both sexes combined as starting model. Subsequently, change in sex-specific social  
243 time was replaced in the final model with change in sexual behaviours performed (males) or sexual  
244 behaviours received (females) and these models were compared based on AICc. We calculated AICc  
245 using the 'AICctab()' function of the *bbmle* package (Bolker & R Development Core Team, 2021). We  
246 report the difference in AICc, inferring a relevant improvement of the model if the AIC decreases with >  
247 2. To examine whether correlations between social change and individual foraging success could be  
248 explained by either social time before the first food patch availability (S0) or social time after the first  
249 food session (S1), we first tested for correlations between these variables using Spearman rank  
250 correlation tests. Next, we substituted social change in the final model for either of these social measures  
251 and calculated the AICc.

252 Lastly, to test if patch arrival predicted food intake, we calculated the total number of feeding events per  
253 individual and correlated these with the proportion of time an individual arrived at a food patch, using  
254 Spearman rank correlations. We ran these analyses for males and females separately.

## 255 Results

### 256 Consistency of sociality

257 Groups consistently differed in how much time their members spent socially across the three social  
258 sessions during control treatment, also when accounting for variation in group size and foraging  
259 motivation ( $R_{\text{adj}} = 0.48$ ,  $SE = 0.16$ ,  $P = 0.01$ , Fig. 1). In contrast to the control sessions, groups did not  
260 consistently differ in the time they spent socially across all three social sessions during food treatment  
261 ( $R_{\text{adj}} = 0.15$ ,  $SE = 0.16$ ,  $P = 1.00$ , Fig. 1), but they did differ when solely considering the second and  
262 third session, i.e., after the start of food patch presentations ( $R_{\text{adj}} = 0.62$ ,  $SE = 0.15$ ,  $P = 0.007$ , Fig. 1).  
263 This suggests that ephemeral food patch availability induced an apparent reranking among the groups in  
264 their level of sociality. Ephemeral food patch availability also significantly increased the variance among  
265 the groups in their time spent social (Food:  $W_{2,51} = 6.13$ ,  $P = 0.004$ ; Control:  $W_{2,51} = 0.49$ ,  $P = 0.61$ , Fig.  
266 1).

### 267 Ephemeral resource effects on sociality

268 Ephemeral food patch availability made the fish groups substantially more social (Treatment\*Session:  
269  $\chi^2 = 55.65$ ,  $P < 0.001$ ; Table S1 & S2, Fig. 1). The average proportion of time spent socially by fish  
270 groups rose twofold, from 0.22 (S0: 95% CI = 0.18-0.26) to 0.46 (S1: 95% CI = 0.39-0.53) and 0.48  
271 (S2: 95% CI = 0.40-0.57). Across the three control sessions, the social time remained relatively  
272 constant, at 0.26 (S0: 95% CI = 0.22-0.31), 0.23 (S1: 95% CI = 0.19-0.27) and 0.25 (S2: 95% CI =  
273 0.21-0.29), respectively. An increase in sociality following food patch availability was still detectable the  
274 next morning (Treatment: Estimate (Est)  $\pm$  SE =  $0.09 \pm 0.04$ ,  $N = 18$ ,  $F = 6.42$ ,  $P = 0.02$ , Fig. 1). More

275 motivated fish groups, i.e., groups in which a larger proportion of individuals fed when they were present  
276 at a food patch, showed a stronger social increase than less motivated groups (Treatment\*Foraging  
277 motivation:  $\chi^2 = 9.53$ ,  $P = 0.002$ , Table S1). Increase in sociality following ephemeral food patch  
278 availability resulted from fish both decreasing their overall probability of ending a social contact  
279 (Treatment\*Session:  $\chi^2 = 20.38$ ,  $P < 0.001$ , Table S3) and increasing the probability of starting a new  
280 social contact (Treatment\*Session:  $\chi^2 = 28.72$ ,  $P < 0.001$ , Table S4). Both females and males became  
281 more social in response to ephemeral food patch availability (Females: Treatment\*Session:  $\chi^2 = 27.65$ ,  
282  $P < 0.001$ , Table S5; Males: Treatment\*Session:  $\chi^2 = 40.52$ ,  $P < 0.001$ , Table S6). Yet only males still  
283 showed an increase in sociality the morning after (Males: Treatment: Est  $\pm$  SE =  $0.11 \pm 0.03$ ,  $N = 18$ ,  
284  $F = 10.77$ ,  $P = 0.005$ ; Females: Treatment: Est  $\pm$  SE =  $0.07 \pm 0.06$ ,  $N = 18$ ,  $F = 1.54$ ,  $P = 0.23$ ).

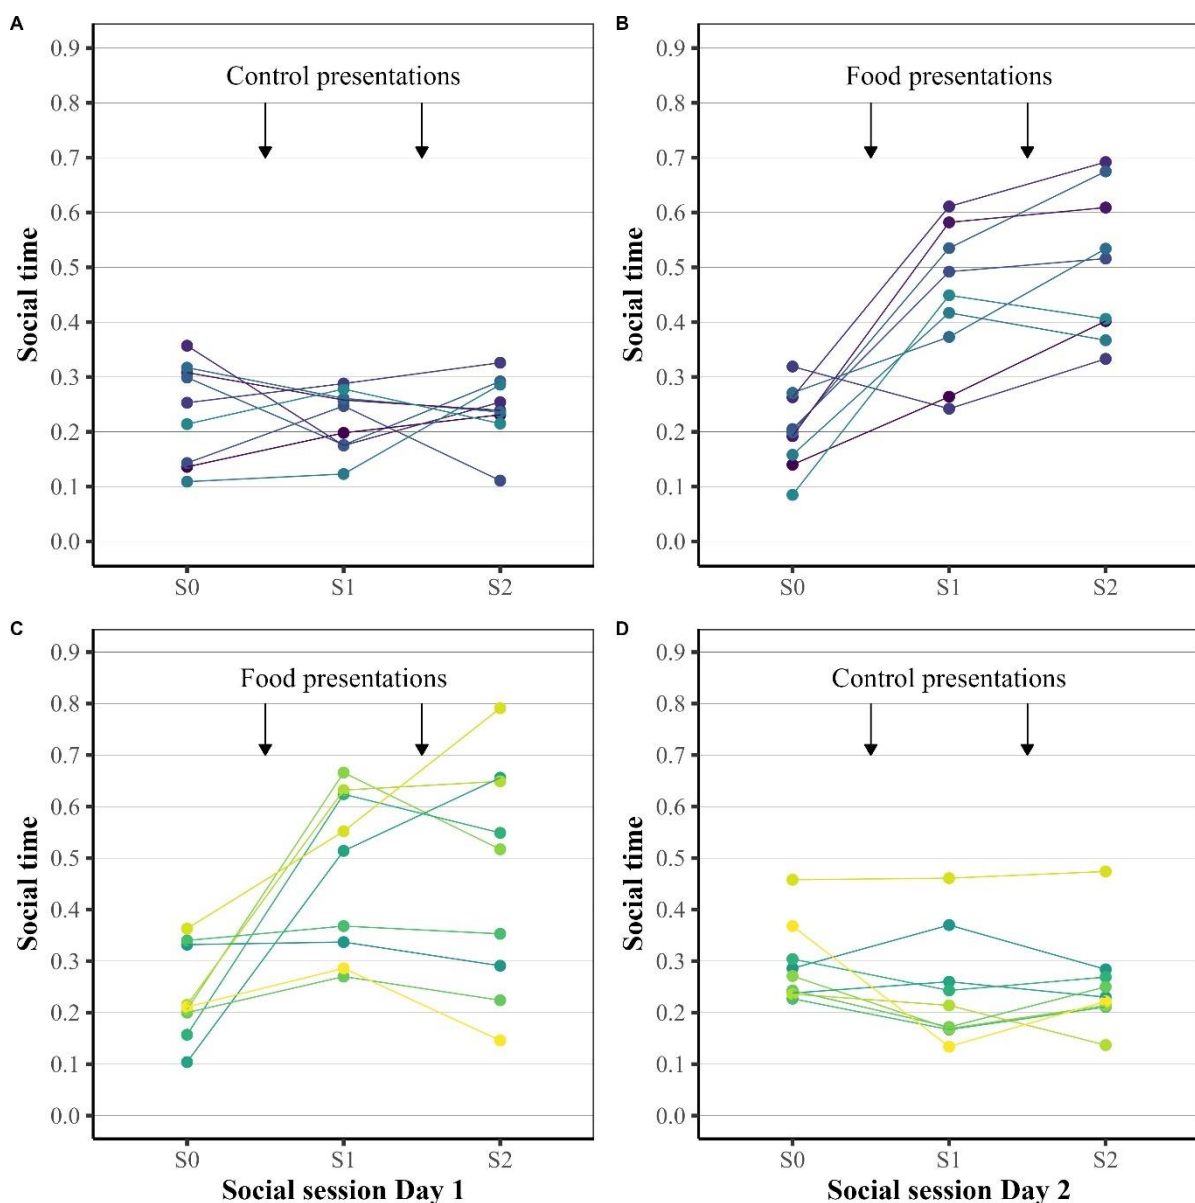

285  
286 **Figure 1.** Time spent socially by 18 groups of wild guppies before, between, and after two series of repeated  
287 food patch or control patch presentations at five fixed locations per pool. The timing of the presentations is  
288 indicated by arrows. A) Groups that received the control treatment on the first day received B) the food  
289 treatment on the second day. C) Groups that received the food treatment on the first day received D) the  
290 control treatment on the second day. The social time values at the first social observation session (S0) of the



291 second day visualizes the prolonged effects of exposure to ephemeral food availability on group-level social  
292 time. Different colours depict group ID's.

### 293 **Change in sociality and individual foraging success**

294 Change in group-level sociality positively correlated with food patch arrival for individuals from motivated  
295 groups (Social change\*Foraging motivation:  $\chi^2 = 4.81$ ,  $P = 0.03$ ; Table S7; Fig. 2). This relationship  
296 between the arrival of individuals at detected food patches and group-level social change did not differ  
297 between the sexes (Social change\*Sex:  $\chi^2 = 2.59$ ,  $P = 0.11$ ; Table S7). Both females and males that  
298 reached more of the ephemeral food patches benefitted from more feeding events (Females:  $r_s = 0.94$ ,  $N = 69$ ,  $P < 0.001$ ; Males:  $r_s = 0.90$ ,  $N = 71$ ,  $P < 0.001$ ). The degree to which groups changed in sociality  
300 related negatively to the social time before the first food patches were available (S0:  $r_s = -0.54$ ,  $N = 18$ ,  
301  $P = 0.02$ ) and positively to the social time after the first availability (S1:  $r_s = 0.88$ ,  $N = 18$ ,  $P < 0.001$ ).  
302 Social time at S0 and S1 could independently explain the arrival of fish at food patches as good as social  
303 change (Delta AICc < 2).

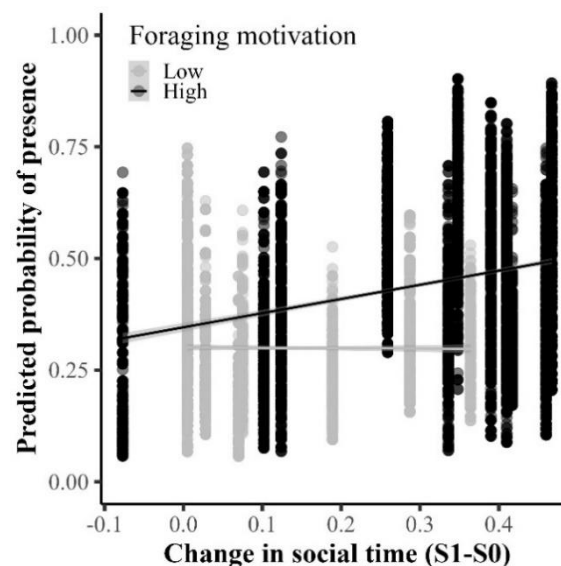

304  
305 **Figure 2.** Predicted probability of an individual arriving at a detected food patch in relation to the change in  
306 time spent socially by an individual's group following the first series of ephemeral food patch presentations.  
307 Predictions were retrieved from the final model for individual presence or absence at a detected food patch.  
308 Foraging motivation is visualized as categorical for illustration purposes but was analysed as a continuous  
309 variable in the model analysis (Low:  $\leq 0.5$ , High:  $> 0.5$ ). Trend lines and corresponding standard errors (grey  
310 area) were calculated using the function 'geom\_smooth()' from the package 'ggplot2'.

### 311 **No carry-over effects**

312 The increase in group-level sociality during the food treatment was not a simple consequence of food-  
313 induced local aggregation. Social contacts after food presentations were not more likely to take place in  
314 the spatial zone of the most recent food patch presentation compared to the same zone before any food  
315 patch became available (Table S8). Individuals were also not more social if they were more quickly  
316 observed after the first food presentations (S1: Kendall's correlation coefficient = 0.03,  $P = 0.37$ ; Fig.  
317 S1), although they were after the second (S2: Kendall's correlation coefficient = 0.15,  $P = 0.01$ ; Fig.  
318 S2).

### 319 **Ephemeral resource effects on sexual behaviours**

320 Corresponding with the increase in group-level sociality, males performed more display and harassment  
321 behaviours after the first availability of ephemeral food patches (Treatment\*Session:  $\chi^2 = 22.94$ ,  $P <$   
322  $0.001$ ; Table S9) and, consequently, females received more of such sexual behaviours  
323 (Treatment\*Session:  $\chi^2 = 6.92$ ,  $P = 0.03$ ; Table S10). Males also displayed and harassed more frequently  
324 in the morning after food patch availability, compared to after control (Treatment Males:  
325  $Est \pm SE = 1.02 \pm 0.34$ ,  $N = 18$ ,  $\chi^2 = 9.00$ ,  $P = 0.003$ ). Even though social time and sexual behaviour  
326 frequency were correlated (Males:  $r_s = 0.54$ ,  $N = 108$ ,  $P < 0.001$ ; Females:  $r_s = 0.57$ ,  $N = 108$ ,  $P <$   
327  $0.001$ ), the increase in social time explained the increase in individual patch arrival better (Table S11-  
328 S12) than the increase in sexual behaviours (Sexual behaviour Males: Delta AICc = 6.12; Females: Delta  
329 Delta AICc = 3.59).

## 330 Discussion

331 With our experimental field study, we showed that groups of wild guppies consistently differed in sociality  
332 under baseline conditions, yet rapidly, substantially, and prolongedly responded to ephemeral resource  
333 availability with an increase in sociality. In motivated groups, this increase in sociality positively  
334 correlated to individual foraging success for both sexes.

335 Ephemeral resource availability doubled the social time of wild guppy groups. This increase was not a  
336 simple reflection of resource-induced local aggregation. Rather the increase in social time was present  
337 independent of the location of the last detected resource and after the resources were no longer  
338 available. Interestingly, previous manipulations of environment and density in the same population did  
339 not similarly alter social time with this magnitude (Wilson et al., 2015; Krause et al., 2017), emphasizing  
340 the importance of foraging context for sociality. Experimental lab studies similarly showed group-level  
341 social responses towards a change in the foraging context, albeit in a different direction than ours (Hoare  
342 et al., 2004; Jolles et al., 2018; Schaerf et al., 2017). For example, x-ray tetra's (*Pristella maxillaris*) and  
343 banded killifish (*Fundulus diaphanus*) reduced encounter frequency and group size, respectively, during  
344 exposure to food cues (Hoare et al., 2004; Schaerf et al., 2017). Given that the benefit of sociality varies  
345 between populations and species, and likely depends on factors such as the baseline level of sociality and  
346 the cost of aggressive food competition, this is not surprising. Highly social groups may do better by  
347 initially reducing sociality, or becoming more disordered (MacGregor et al., 2020), allowing for the  
348 gathering of more independent private information. However, guppies in our wild low-predation  
349 population are much less social, spending the majority of their time alone, and show very little  
350 aggression. Individuals in such systems, i.e., non-aggressive fission-fusion or shoaling rather than  
351 schooling populations, may thus do better by increasing sociality, rather than reducing, and so increase  
352 exposure to social information on resources gathered by conspecifics. A population comparison would be  
353 an interesting next step.

354 Evidence for consistent, yet responsive, sociality has grown in recent years (Jolles et al., 2018;  
355 MacGregor & Ioannou, 2022; Planas-Sitjà et al., 2015; Schaerf et al., 2017). Our guppy groups  
356 consistently varied in sociality across control (i.e., empty) patch availability, but not across resource  
357 availability. Additionally, variation in group-level sociality remained comparable across control but  
358 increased across resource availability. We can exclude a mere effect of time or familiarity on increasing  
359 group differences in sociality (MacGregor & Ioannou, 2022), as we did not see a similar pattern during  
360 control treatments. Interestingly, groups did vary consistently across resource availability when  
361 excluding the social observations before the first series of food patch availability, i.e., the social baseline,

362 suggesting a resource-induced change in which groups are generally most social. Some groups thus  
363 responded more strongly, and arguably more appropriately, than others. This appears in contrast to  
364 Jolles *et al.* (2018), who found that differences in group-structure between groups of three-spined  
365 sticklebacks remained consistent before and after resource depletion. Variation in the foraging motivation  
366 of our groups is an unlikely explanation since repeatability estimates were adjusted for motivation.  
367 Possibly, individual heterogeneity in within-group composition played a role. Individual heterogeneity can  
368 impact group functioning (Farine *et al.*, 2015; Jolles *et al.*, 2019) and individual foraging success (Dyer  
369 *et al.*, 2009). Between-group differences in group composition, such as variation in the locomotion and  
370 personality types of group members can generate consistent between-group differences in cohesion,  
371 alignment, and leadership (Jolles *et al.*, 2017, 2020). There is, however, little evidence on how group  
372 composition affects group-level responsiveness to ecologically relevant changes in the environment. And  
373 even less so in the wild. Particular compositions of (social) phenotypes may generate more adaptively  
374 responsive groups and so shape the natural selection of these phenotypes.

375 Social time after the first series of food patch presentations could explain patch arrival equally well as the  
376 change in social time. Given that patch discovery and food intake were highly correlated, it is therefore  
377 difficult to disentangle whether the observed increase in sociality is the result of a strategy to increase  
378 patch discovery, for example, by increasing exposure to social information on food patch locations, or the  
379 result of an increase in sexual or anti-predator behaviour following patch discovery (and thus food  
380 intake). However, change in social time better explained individual arrival at detected food patches than  
381 the change in sexual behaviours, indicating that an increase in sexual behaviours following feeding is not  
382 sufficient to explain our findings. The increase in sexual behaviour is nevertheless interesting as it  
383 illustrates how males may enjoy both survival and reproductive benefits from finding more food patches  
384 (Abrahams, 1993). Increased investment in anti-predator behaviour after feeding also seems an unlikely  
385 explanation for the increase in sociality in this low-predation population. The lack of interaction between  
386 social change and the two series of food presentations suggests that individuals were still motivated to  
387 forage during the second series of food presentations, and thus that a potential change to a more risk-  
388 averse state after the first series of presentations is improbable. To get a better insight into whether the  
389 observed change in sociality could be (partly) a strategic response to locate more ephemeral resources,  
390 future studies would ideally repeat our experiment using food cues (Hoare *et al.*, 2004; Schaerf *et al.*,  
391 2017), rather than actual food. This is, however, a challenging endeavour to accomplish with fish in the  
392 wild.

393 Group-level responses are not necessarily the sum of individual responses (Bengston & Jandt, 2014) and  
394 groups may outperform individuals (Sasaki *et al.*, 2013). Our experimental design to test for changes in  
395 sociality in the wild restricted our ability to additionally gather robust estimates on the individual level  
396 and thus to explore to what degree the group-level sociality change may have been an emergent  
397 property. In future research, when advancements in automated video-tracking allow the collection of  
398 robust social data on both individual and group-level for fish in the wild, it would be interesting to test  
399 whether the change in group-level sociality is a better predictor of individual foraging success than the  
400 change in individual-level sociality. And if so, whether this holds for all individuals. Individuals may differ  
401 in how much they improve in foraging success when foraging socially compared to solitary, which may  
402 drive individual differences in sociability, which in turn may be maintained through alternating selective  
403 forces in dynamic environments. Social foragers will be more vulnerable to large fluctuations in  
404 population density (Harel *et al.*, 2017), while solitary foragers will generally experience greater variance

405 in foraging success and thus be more at risk during fluctuations in resource availability (Brown, 1988;  
406 Jolles et al., 2017).

407 Our finding that ephemeral resource availability substantially affects the social dynamics of a wild fish  
408 population has implications for our understanding of the social impacts of purposeful or unintended  
409 supplemental feeding of wild animals in the context of eco-tourism (e.g. shark chumming), garden bird  
410 feeding and garbage and waste management. Several studies have quantified changes in the social  
411 behaviour of wildlife at provisioning sites (Hundt et al., 2022; Jacoby et al., 2021; Smulders et al.,  
412 2021), but few have studied whether social behaviour is also affected away from the resource sites (e.g.,  
413 Grubb, 1987). A recent study of green turtles (*Chelonia mydas*) revealed that during touristic feeding  
414 events, turtles showed atypical aggressive behaviour (Smulders et al., 2021), while another study found  
415 partial evidence for reduced connectivity in the preference networks of tiger sharks (*Galeocerdo cuvier*)  
416 at ecotourist provisioning sites (Jacoby et al., 2021). It would be relevant to investigate whether  
417 substantial local impacts of provisioning on wildlife sociality carry over to the overall social structure and  
418 whether such carry-overs may be acceptable from a (disease) management perspective or whether  
419 changes to the provisioning protocols are desired (Snijders, Blumstein, et al., 2017; van Overveld et al.,  
420 2020). Similarly, in situations in which wildlife, such as crows, coyotes (*Canis latrans*), gulls, and rats,  
421 take advantage of unintended food provisioning (e.g., garbage), it would be fascinating to experimentally  
422 examine whether these animal populations become more social to take advantage of these ephemeral  
423 anthropogenic resources.

424 In summary, we show that ephemeral resource availability generates substantial changes in an otherwise  
425 consistent group-level trait. Individuals from groups that changed more, obtained fitness-relevant  
426 benefits in the form of increased foraging success. If all, or certain classes of, individuals from  
427 facultatively social populations indeed profit from being in more socially responsive and motivated  
428 groups, we may expect natural selection to favour individual traits that induce or find such groups.

## 429 References

- 430 Abrahams, M. V. (1993). The trade-off between foraging and courting in male guppies. *Animal*  
431 *Behaviour*, 45(4), 673–681. <https://doi.org/10.1006/anbe.1993.1082>
- 432 Aplin, L. M., Farine, D. R., Morand-Ferron, J., & Sheldon, B. C. (2012). Social networks predict patch  
433 discovery in a wild population of songbirds. *Proceedings of the Royal Society B: Biological*  
434 *Sciences*, 279(1745), 4199–4205. <https://doi.org/10.1098/rspb.2012.1591>
- 435 Aplin, L. M., Firth, J. A., Farine, D. R., Voelkl, B., Crates, R. A., Culina, A., Garroway, C. J., Hinde, C. A.,  
436 Kidd, L. R., Psorakis, I., Milligan, N. D., Radersma, R., Verhelst, B. L., & Sheldon, B. C. (2015).  
437 Consistent individual differences in the social phenotypes of wild great tits, *Parus major*. *Animal*  
438 *Behaviour*, 108, 117–127. <https://doi.org/10.1016/j.anbehav.2015.07.016>
- 439 Barbosa, M., Deacon, A. E., Janeiro, M. J., Ramnarine, I., Morrissey, M. B., & Magurran, A. E. (2018).  
440 Individual variation in reproductive behaviour is linked to temporal heterogeneity in predation  
441 risk. *Proceedings of the Royal Society B: Biological Sciences*, 285(1870), 20171499.  
442 <https://doi.org/10.1098/rspb.2017.1499>
- 443 Bates, D., Maechler, M., Bolker, B., & Walker, S. (2015). Fitting linear mixed-effects models using lme4.  
444 *Journal of Statistical Software*, 67(1), 1–48. <https://doi.org/10.18637/jss.v067.i01>

- 445 Bengston, S. E., & Jandt, J. M. (2014). The development of collective personality: The ontogenetic  
446 drivers of behavioral variation across groups. *Frontiers in Ecology and Evolution*, *2*, 81.  
447 <https://doi.org/10.3389/fevo.2014.00081>
- 448 Bierbach, D., Landgraf, T., Romanczuk, P., Lukas, J., Nguyen, H., Wolf, M., & Krause, J. (2018). Using a  
449 robotic fish to investigate individual differences in social responsiveness in the guppy. *Royal  
450 Society Open Science*, *5*(8), 181026. <https://doi.org/10.1098/rsos.181026>
- 451 Blanckenhorn, W. V. (1991). Fitness consequences of foraging success in water striders (Gerris remigis;  
452 Heteroptera: Gerridae). *Behavioral Ecology*, *2*(1), 46–55.  
453 <https://doi.org/10.1093/beheco/2.1.46>
- 454 Bolker, B., & R Development Core Team. (2021). *bbmle: Tools for General Maximum Likelihood  
455 Estimation*. (1.0.24) [R package 1.0.24]. <https://CRAN.R-project.org/package=bbmle>
- 456 Bradbury, J. W., & Vehrencamp, S. L. (1977). Social Organization and Foraging in Emballonurid Bats: IV.  
457 Parental Investment Patterns. *Behavioral Ecology and Sociobiology*, *2*(1), 19–29.
- 458 Brown, C. R. (1988). Social foraging in cliff swallows: Local enhancement, risk sensitivity, competition  
459 and the avoidance of predators. *Animal Behaviour*, *36*(3), 780–792.  
460 [https://doi.org/10.1016/S0003-3472\(88\)80161-1](https://doi.org/10.1016/S0003-3472(88)80161-1)
- 461 Chapman, C. A., Chapman, L. J., & Wrangham, R. W. (1995). Ecological constraints on group size: An  
462 analysis of spider monkey and chimpanzee subgroups. *Behavioral Ecology and Sociobiology*,  
463 *36*(1), 59–70. <https://doi.org/10.1007/BF00175729>
- 464 Clark, C. W., & Mangel, M. (1986). The evolutionary advantages of group foraging. *Theoretical Population  
465 Biology*, *30*(1), 45–75. [https://doi.org/10.1016/0040-5809\(86\)90024-9](https://doi.org/10.1016/0040-5809(86)90024-9)
- 466 Clay, T. A., Pearmain, E. J., McGill, R. A. R., Manica, A., & Phillips, R. A. (2018). Age-related variation in  
467 non-breeding foraging behaviour and carry-over effects on fitness in an extremely long-lived  
468 bird. *Functional Ecology*, *32*(7), 1832–1846. <https://doi.org/10.1111/1365-2435.13120>
- 469 Croft, D. P., Albanese, B., Arrowsmith, B. J., Botham, M., Webster, M., & Krause, J. (2003). Sex-biased  
470 movement in the guppy (*Poecilia reticulata*). *Oecologia*, *137*(1), 62–68.  
471 <https://doi.org/10.1007/s00442-003-1268-6>
- 472 Deacon, A. E., Jones, F. A. M., & Magurran, A. E. (2018). Gradients in predation risk in a tropical river  
473 system. *Current Zoology*, *64*(2), 213–221. <https://doi.org/10.1093/cz/zoy004>
- 474 Dorning, J., & Harris, S. (2019). Individual and seasonal variation in contact rate, connectivity and  
475 centrality in red fox (*Vulpes vulpes*) social groups. *Scientific Reports*, *9*(1), 1–11.  
476 <https://doi.org/10.1038/s41598-019-56713-3>
- 477 Dyer, J. R. G., Croft, D. P., Morrell, L. J., & Krause, J. (2009). Shoal composition determines foraging  
478 success in the guppy. *Behavioral Ecology*, *20*(1), 165–171.  
479 <https://doi.org/10.1093/beheco/arn129>
- 480 Ellis, S., Franks, D. W., Natrass, S., Cant, M. A., Weiss, M. N., Giles, D., Balcomb, K. C., & Croft, D. P.  
481 (2017). Mortality risk and social network position in resident killer whales: Sex differences and  
482 the importance of resource abundance. *Proceedings of the Royal Society B: Biological Sciences*,  
483 *284*(1865), 20171313. <https://doi.org/10.1098/rspb.2017.1313>
- 484 Farine, D. R., Montiglio, P.-O., & Spiegel, O. (2015). From Individuals to Groups and Back: The  
485 Evolutionary Implications of Group Phenotypic Composition. *Trends in Ecology & Evolution*,  
486 *30*(10), 609–621. <https://doi.org/10.1016/j.tree.2015.07.005>
- 487 Formica, V. A., Wood, C., Larsen, W., Butterfield, R., Augat, M., Hougen, H., & Brodie, E. (2012). Fitness  
488 consequences of social network position in a wild population of forked fungus beetles

- 489 (Bolitotherus cornutus). *Journal of Evolutionary Biology*, 25(1), 130–137.  
490 <https://doi.org/10.1111/j.1420-9101.2011.02411.x>
- 491 Foster, E. A., Franks, D. W., Morrell, L. J., Balcomb, K. C., Parsons, K. M., van Ginneken, A., & Croft, D.  
492 P. (2012). Social network correlates of food availability in an endangered population of killer  
493 whales, *Orcinus orca*. *Animal Behaviour*, 83(3), 731–736.  
494 <https://doi.org/10.1016/j.anbehav.2011.12.021>
- 495 Garcia, T., & De Monte, S. (2013). Group Formation and the Evolution of Sociality. *Evolution*, 67(1),  
496 131–141. <https://doi.org/10.1111/j.1558-5646.2012.01739.x>
- 497 Grand, T. C., & Dill, L. M. (1999). The effect of group size on the foraging behaviour of juvenile coho  
498 salmon: Reduction of predation risk or increased competition? *Animal Behaviour*, 58(2), 443–  
499 451. <https://doi.org/10.1006/anbe.1999.1174>
- 500 Greenwood, A. K., Wark, A. R., Yoshida, K., & Peichel, C. L. (2013). Genetic and Neural Modularity  
501 Underlie the Evolution of Schooling Behavior in Threespine Sticklebacks. *Current Biology*,  
502 23(19), 1884–1888. <https://doi.org/10.1016/j.cub.2013.07.058>
- 503 Grether, G. F., Millie, D. F., Bryant, M. J., Reznick, D. N., & Mayea, W. (2001). Rain forest canopy cover,  
504 resource availability, and life history evolution in guppies. *Ecology*, 82(6), 1546–1559.  
505 <https://doi.org/10.2307/2679799>
- 506 Grubb, T. C. (1987). Changes in the flocking behaviour of wintering English titmice with time, weather  
507 and supplementary food. *Animal Behaviour*, 35(3), 794–806. [https://doi.org/10.1016/S0003-3472\(87\)80116-1](https://doi.org/10.1016/S0003-3472(87)80116-1)
- 509 Harel, R., Spiegel, O., Getz, W. M., & Nathan, R. (2017). Social foraging and individual consistency in  
510 following behaviour: Testing the information centre hypothesis in free-ranging vultures.  
511 *Proceedings of the Royal Society B: Biological Sciences*, 284(1852), 20162654.  
512 <https://doi.org/10.1098/rspb.2016.2654>
- 513 Harpaz, R., & Schneidman, E. (2020). Social interactions drive efficient foraging and income equality in  
514 groups of fish. *ELife*, 9, e56196. <https://doi.org/10.7554/eLife.56196>
- 515 Hartig, F. (2021). *DHARMA: Residual Diagnostics for Hierarchical (Multi-Level / Mixed) Regression Models*  
516 (0.4.3) [R package 0.4.3]. <https://CRAN.R-project.org/package=DHARMA>
- 517 Heathcote, R. J. P., Darden, S. K., Franks, D. W., Ramnarine, I. W., & Croft, D. P. (2017). Fear of  
518 predation drives stable and differentiated social relationships in guppies. *Scientific Reports*, 7.  
519 <https://doi.org/10.1038/srep41679>
- 520 Herringe, C. A., Middleton, E. J., Boyd, K. C., Latty, T., & White, T. E. (2022). Benefits and costs of social  
521 foraging in velvet worms. *Ethology*, 128(3), 197–206. <https://doi.org/10.1111/eth.13256>
- 522 Hoare, D. J., Couzin, I. D., Godin, J.-G. J., & Krause, J. (2004). Context-dependent group size choice in  
523 fish. *Animal Behaviour*, 67(1), 155–164. <https://doi.org/10.1016/j.anbehav.2003.04.004>
- 524 Hundt, P. J., White, L. A., Craft, M. E., & Bajer, P. G. (2022). Social associations in common carp  
525 (*Cyprinus carpio*): Insights from induced feeding aggregations for targeted management  
526 strategies. *Ecology and Evolution*, 12(3), e8666. <https://doi.org/10.1002/ece3.8666>
- 527 Jacoby, D. M. P., Fairbairn, B. S., Frazier, B. S., Gallagher, A. J., Heithaus, M. R., Cooke, S. J., &  
528 Hammerschlag, N. (2021). Social Network Analysis Reveals the Subtle Impacts of Tourist  
529 Provisioning on the Social Behavior of a Generalist Marine Apex Predator. *Frontiers in Marine*  
530 *Science*, 8. <https://www.frontiersin.org/article/10.3389/fmars.2021.665726>
- 531 Jolles, J. W., Boogert, N. J., Sridhar, V. H., Couzin, I. D., & Manica, A. (2017). Consistent individual  
532 differences drive collective behavior and group functioning of schooling fish. *Current Biology*,  
533 27(18), 2862–2868.e7. <https://doi.org/10.1016/j.cub.2017.08.004>

- 534 Jolles, J. W., King, A. J., & Killen, S. S. (2019). The Role of Individual Heterogeneity in Collective Animal  
535 Behaviour. *Trends in Ecology & Evolution*. <https://doi.org/10.1016/j.tree.2019.11.001>
- 536 Jolles, J. W., Laskowski, K. L., Boogert, N. J., & Manica, A. (2018). Repeatable group differences in the  
537 collective behaviour of stickleback shoals across ecological contexts. *Proc. R. Soc. B*, *285*(1872),  
538 20172629. <https://doi.org/10.1098/rspb.2017.2629>
- 539 Jolles, J. W., Weimar, N., Landgraf, T., Romanczuk, P., Krause, J., & Bierbach, D. (2020). Group-level  
540 patterns emerge from individual speed as revealed by an extremely social robotic fish. *Biology  
541 Letters*, *16*(9), 20200436. <https://doi.org/10.1098/rsbl.2020.0436>
- 542 Kaiser, S. A., Martin, T. E., Oteyza, J. C., Armstad, C., & Fleischer, R. C. (2018). Direct fitness benefits  
543 and kinship of social foraging groups in an Old World tropical babbler. *Behavioral Ecology*, *29*(2),  
544 468–478. <https://doi.org/10.1093/beheco/arx196>
- 545 Karplus, I., Katzenstein, R., & Goren, M. (2006). Predator recognition and social facilitation of predator  
546 avoidance in coral reef fish *Dascyllus marginatus* juveniles. *Marine Ecology Progress Series*, *319*,  
547 215–223. <https://doi.org/10.3354/meps319215>
- 548 Krause, J., & Ruxton, G. D. (2002). *Living in groups*. Oxford University Press.
- 549 Krause, S., Wilson, A. D. M., Ramnarine, I. W., Herbert-Read, J. E., Clément, R. J. G., & Krause, J.  
550 (2017). Guppies occupy consistent positions in social networks: Mechanisms and consequences.  
551 *Behavioral Ecology*. <https://doi.org/10.1093/beheco/arw177>
- 552 Krebs, J. R., MacRoberts, M. H., & Cullen, J. M. (1972). Flocking and Feeding in the Great Tit *Parus  
553 Major*—an Experimental Study. *Ibis*, *114*(4), 507–530. [https://doi.org/10.1111/j.1474-  
919X.1972.tb00852.x](https://doi.org/10.1111/j.1474-<br/>554 919X.1972.tb00852.x)
- 555 Kulahci, I. G., Ghazanfar, A. A., & Rubenstein, D. I. (2018). Knowledgeable Lemurs Become More Central  
556 in Social Networks. *Current Biology*. <https://doi.org/10.1016/j.cub.2018.02.079>
- 557 Landeau, L., & Terborgh, J. (1986). Oddity and the 'confusion effect' in predation. *Animal Behaviour*,  
558 *34*(5), 1372–1380. [https://doi.org/10.1016/S0003-3472\(86\)80208-1](https://doi.org/10.1016/S0003-3472(86)80208-1)
- 559 Lenth, R. V. (2021). *emmeans: Estimated Marginal Means, aka Least-Squares Means* (1.6.3) [R package  
560 1.6.3]. <https://CRAN.R-project.org/package=emmeans>
- 561 Ling, H., Mclvor, G. E., Westley, J., van der Vaart, K., Vaughan, R. T., Thornton, A., & Ouellette, N. T.  
562 (2019). Behavioural plasticity and the transition to order in jackdaw flocks. *Nature  
563 Communications*, *10*(1), 5174. <https://doi.org/10.1038/s41467-019-13281-4>
- 564 MacGregor, H. E. A., Herbert-Read, J. E., & Ioannou, C. C. (2020). Information can explain the dynamics  
565 of group order in animal collective behaviour. *Nature Communications*, *11*(1), 2737.  
566 <https://doi.org/10.1038/s41467-020-16578-x>
- 567 MacGregor, H. E. A., & Ioannou, C. C. (2022). Collective motion diminishes, but variation between  
568 groups emerges, through time in fish shoals. *Royal Society Open Science*, *8*(10), 210655.  
569 <https://doi.org/10.1098/rsos.210655>
- 570 Morand-Ferron, J., & Quinn, J. L. (2011). Larger groups of passerines are more efficient problem solvers  
571 in the wild. *Proceedings of the National Academy of Sciences*, *108*(38), 15898–15903.  
572 <https://doi.org/10.1073/pnas.1111560108>
- 573 Morse, D. H., & Stephens, E. G. (1996). The consequences of adult foraging success on the components  
574 of lifetime fitness in a semelparous, sit and wait predator. *Evolutionary Ecology*, *10*(4), 361–373.  
575 <https://doi.org/10.1007/BF01237723>
- 576 Oh, K. P., & Badyaev, A. V. (2010). Structure of social networks in a passerine bird: Consequences for  
577 sexual selection and the evolution of mating strategies. *The American Naturalist*, *176*(3), E80–  
578 E89. <https://doi.org/10.1086/655216>

- 579 Pitcher, T. J., Magurran, A. E., & Winfield, I. J. (1982). Fish in larger shoals find food faster. *Behavioral*  
580 *Ecology and Sociobiology*, 10(2), 149–151. <https://doi.org/10.1007/BF00300175>
- 581 Planas-Sitjà, I., Deneubourg, J.-L., Gibon, C., & Sempo, G. (2015). Group personality during collective  
582 decision-making: A multi-level approach. *Proceedings of the Royal Society B: Biological*  
583 *Sciences*, 282(1802), 20142515. <https://doi.org/10.1098/rspb.2014.2515>
- 584 R Core Team. (2021). *R: A Language and environment for statistical computing*. R Foundation for  
585 Statistical Computing. <https://www.R-project.org/>
- 586 Rodriguez-Pinto, I. I., Rieucou, G., Handegard, N. O., & Boswell, K. M. (2020). Environmental context  
587 elicits behavioural modification of collective state in schooling fish. *Animal Behaviour*, 165, 107–  
588 116. <https://doi.org/10.1016/j.anbehav.2020.05.002>
- 589 Rubenstein, D. R., & Abbot, P. (2017). *Comparative Social Evolution*. Cambridge University Press.
- 590 Ryder, T. B., Parker, P. G., Blake, J. G., & Loiselle, B. A. (2009). It takes two to tango: Reproductive  
591 skew and social correlates of male mating success in a lek-breeding bird. *Proceedings of the*  
592 *Royal Society B: Biological Sciences*, 276(1666), 2377–2384.  
593 <https://doi.org/10.1098/rspb.2009.0208>
- 594 Sasaki, T., Granovskiy, B., Mann, R. P., Sumpter, D. J. T., & Pratt, S. C. (2013). Ant colonies outperform  
595 individuals when a sensory discrimination task is difficult but not when it is easy. *Proceedings of*  
596 *the National Academy of Sciences*, 110(34), 13769–13773.  
597 <https://doi.org/10.1073/pnas.1304917110>
- 598 Schaerf, T. M., Dillingham, P. W., & Ward, A. J. W. (2017). The effects of external cues on individual and  
599 collective behavior of shoaling fish. *Science Advances*, 3(6), e1603201.  
600 <https://doi.org/10.1126/sciadv.1603201>
- 601 Shier, D. M., & Owings, D. H. (2007). Effects of social learning on predator training and postrelease  
602 survival in juvenile black-tailed prairie dogs, *Cynomys ludovicianus*. *Animal Behaviour*, 73(4),  
603 567–577. <https://doi.org/10.1016/j.anbehav.2006.09.009>
- 604 Silk, J. B., Alberts, S. C., & Altmann, J. (2003). Social bonds of female baboons enhance infant survival.  
605 *Science*, 302(5648), 1231–1234. <https://doi.org/10.1126/science.1088580>
- 606 Smulders, F. O.H., O’Shea, O. R., & Christianen, M. J.A. (2021). Animal-borne video reveals atypical  
607 behaviour in provisioned green turtles: A global perspective of a widespread tourist activity.  
608 *Global Ecology and Conservation*, 25, e01417. <https://doi.org/10.1016/j.gecco.2020.e01417>
- 609 Snijders, L., Blumstein, D. T., Stanley, C. R., & Franks, D. W. (2017). Animal Social Network Theory Can  
610 Help Wildlife Conservation. *Trends in Ecology & Evolution*, 32(8), 567–577.  
611 <https://doi.org/10.1016/j.tree.2017.05.005>
- 612 Snijders, L., Krause, S., Tump, A. N., Breuker, M., Ortiz, C., Rizzi, S., Ramnarine, I. W., Krause, J., &  
613 Kurvers, R. H. J. M. (2021). Causal evidence for the adaptive benefits of social foraging in the  
614 wild. *Communications Biology*, 4(1), 1–8. <https://doi.org/10.1038/s42003-020-01597-7>
- 615 Snijders, L., Krause, S., Tump, A. N., Breuker, M., Ramnarine, I. W., Kurvers, R., & Krause, J. (2022).  
616 *Data from: Ephemeral resource availability makes wild guppies more social*. <https://osf.io/75vtn/>
- 617 Snijders, L., Kurvers, R. H. J. M., Krause, S., Ramnarine, I. W., & Krause, J. (2018). Individual- and  
618 population-level drivers of consistent foraging success across environments. *Nature Ecology &*  
619 *Evolution*, 2(10), 1610–1618. <https://doi.org/10.1101/260604>
- 620 Snijders, L., Kurvers, R. H. J. M., Krause, S., Tump, A. N., Ramnarine, I. W., & Krause, J. (2019).  
621 Females facilitate male food patch discovery in a wild fish population. *Journal of Animal Ecology*,  
622 88(12), 1950–1960. <https://doi.org/10.1111/1365-2656.13086>



- 623 Snijders, L., Naguib, M., & Van Oers, K. (2017). Dominance rank and boldness predict social attraction in  
624 great tits. *Behavioral Ecology*, 28(2), 398–406. <https://doi.org/10.1093/beheco/arw158>
- 625 Stoffel, M. A., Nakagawa, S., & Schielzeth, H. (2017). rptR: Repeatability estimation and variance  
626 decomposition by generalized linear mixed-effects models. *Methods in Ecology and Evolution*,  
627 8(11), 1639–1644. <https://doi.org/10.1111/2041-210X.12797>
- 628 van Overveld, T., Blanco, G., Moleón, M., Margalida, A., Sánchez-Zapata, J. A., de la Riva, M., &  
629 Donazar, J. A. (2020). Integrating vulture social behavior into conservation practice. *The*  
630 *Condor*, 122(4), duaa035. <https://doi.org/10.1093/condor/duaa035>
- 631 Wickham, H. (2016). *ggplot2: Elegant graphics for data analysis*. Springer-Verlag.
- 632 Wilson, A. D. M., Krause, S., James, R., Croft, D. P., Ramnarine, I. W., Borner, K. K., Clement, R. J. G.,  
633 & Krause, J. (2014). Dynamic social networks in guppies (*Poecilia reticulata*). *Behavioral Ecology*  
634 *and Sociobiology*, 68(6), 915–925. <https://doi.org/10.1007/s00265-014-1704-0>
- 635 Wilson, A. D. M., Krause, S., Ramnarine, I. W., Borner, K. K., Clément, R. J. G., Kurvers, R. H. J. M., &  
636 Krause, J. (2015). Social networks in changing environments. *Behavioral Ecology and*  
637 *Sociobiology*, 69(10), 1617–1629. <https://doi.org/10.1007/s00265-015-1973-2>
- 638 Wolf, T. E., Ngonga Ngomo, A.-C., Bennett, N. C., Burroughs, R., & Ganswindt, A. (2018). Seasonal  
639 changes in social networks of giraffes. *Journal of Zoology*, 305(2), 82–87.  
640 <https://doi.org/10.1111/jzo.12531>
- 641 Wright, D., Nakamichi, R., Krause, J., & Butlin, R. K. (2006). QTL Analysis of Behavioral and  
642 Morphological Differentiation Between Wild and Laboratory Zebrafish (*Danio rerio*). *Behavior*  
643 *Genetics*, 36(2), 271. <https://doi.org/10.1007/s10519-005-9029-4>
- 644

## 645 Acknowledgements

646 We are grateful to Bertrand Jayles for help with data collection. LS was funded by a Humboldt Research  
647 Fellowship for Postdoctoral Researchers awarded by the Alexander von Humboldt-Stiftung (2018-2019;  
648 Ref 3.3 – NLD – 1192631 - HFST-P) and a Veni Fellowship awarded by the Netherlands Organisation for  
649 Scientific Research (NWO) (2020–current; VI.Veni.192.018).

## 650 Author contributions

651 L.S., R.H.J.M., S.K., and J.K. designed the study. L.S., R.H.J.M., S.K., A.N.T, M.B., and J.K. collected  
652 data, L.S. and S.K. analysed the data; L.S., I.W.R., R.H.J.M.K., and J.K. contributed materials and  
653 infrastructure to the study; L.S. wrote the first draft of the manuscript, and all authors provided  
654 feedback.
